# Supplementary material for: Enhancing the corrosion resistance of waterborne epoxy coatings with functionalized biochar
Source: Royal Society of Chemistry journal article supplement (doi:10.1039/d4ra07421a), 2024-01-01
Supplement: d4ra07421a1.pdf [file d4ra07421a1.pdf]

## Supporting Information

### Enhancing the Corrosion Resistance of Waterborne Epoxy Coatings with Functionalized Biochar

Weiyue Zhu<sup>1, #</sup>, Xin Li<sup>2, #</sup>, Xiaoyan Liu<sup>1</sup>, Liang Bai<sup>1</sup>, Xiaohu Wang<sup>1</sup>, Ao Li<sup>1</sup>, Yujie Han<sup>1</sup>, Chunguang Wei<sup>3, \*</sup>, Junhui Dong<sup>1</sup>, Zeyu Guo<sup>4</sup>, Jun Liu<sup>1, \*</sup>, Ding Nan<sup>1, 2, \*</sup>

<sup>1</sup> Inner Mongolia Key Laboratory of New Materials and Surface Engineering, School of Materials Science and Engineering, Inner Mongolia University of Technology, Hohhot, 010051, China

<sup>2</sup> College of Chemistry and Chemical Engineering, Inner Mongolia University, Hohhot, 010021, China

<sup>3</sup> School of Renewable Energy, Inner Mongolia University of Technology, Ordos, 017010, P.R. China

<sup>4</sup> Inner Mongolia Key Laboratory of Sandy Shrubs Fibrosis and Energy Development and Utilization, College of Materials Science and Art Design, Inner Mongolia Agricultural University, Hohhot 010018, China

<sup>#</sup> W. Zhu and X. Li contributed equally to this work

<sup>\*</sup> Corresponding author. E-mail address: clxylj74@imut.edu.cn (J. Liu), wcg@imut.edu.cn (C. Wei), nd@imu.edu.cn (D. Nan)

## Results and discussion

### Characterizations

The EDS spectra were employed to elucidate the distribution of carboxymethyl chitosan and the corrosion inhibitor on the carbon nanosheets (Fig. S1). C is the characteristic element of the carbon nanosheets, while N and O indicate the presence of carboxymethyl chitosan and the corrosion inhibitor. As depicted in the figure, the uniform distribution of C, O, and N elements across the PCNS confirms the successful functionalization of the PCNS surface with carboxymethyl chitosan and the corrosion inhibitor.

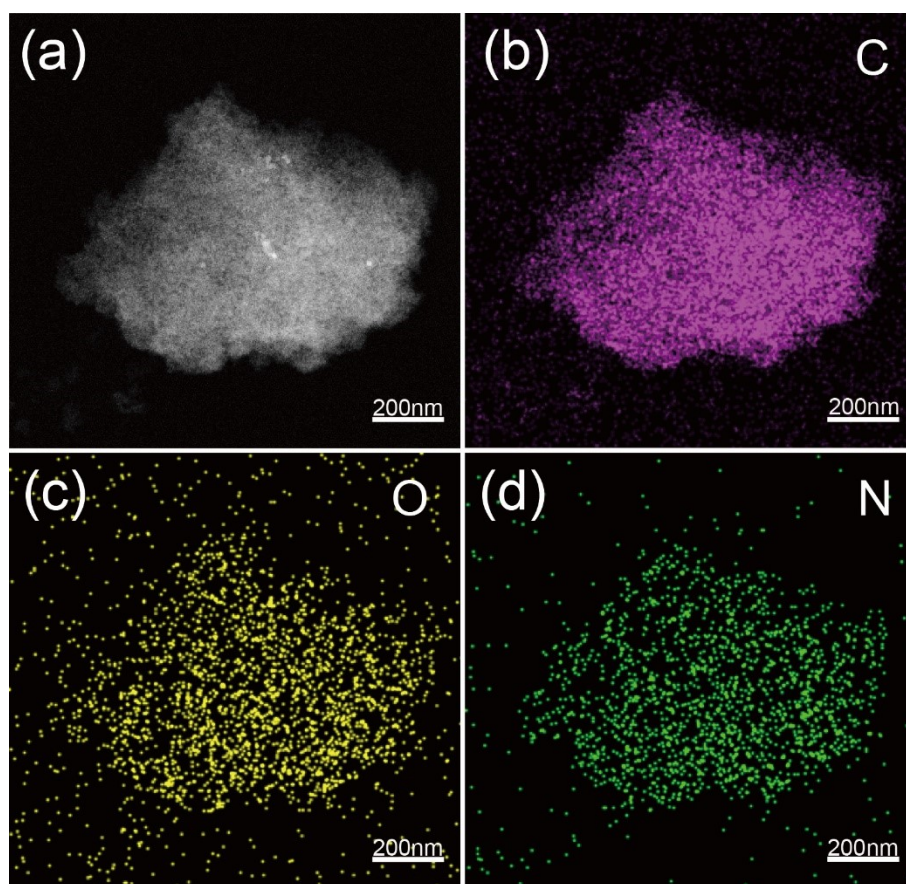

Fig. S1 The TEM-EDS mapping of PCNS@CMCS@8-HQ: (a)TEM image of PCNS@CMCS@8-HQ; (b) C, (c) O, (d) N distribution.

To further clarify the corrosion mechanism of the samples immersed in the solution, the measured EIS results were fitted using equivalent circuit data. Detailed information on the fitting parameters  $R_c$ ,  $R_{ct}$ ,  $CPE_c$ , and  $CPE_{dl}$  can be found in Table S1.

Table S1 Fitting results of EIS plots of the different coatings on metallic substrate after 60 days of immersion

| coatings               | time<br>(day) | CPEc $Y_0$<br>( $\Omega^{-1} \text{ cm}^{-2}$<br>$\text{s}^n$ ) | n    | Rc<br>( $\Omega \text{ cm}^2$ ) | CPEdl $Y_0$<br>( $\Omega^{-1} \text{ cm}^{-2}$<br>$\text{s}^n$ ) | n    | Rct<br>( $\Omega \text{ cm}^2$ ) |
|------------------------|---------------|-----------------------------------------------------------------|------|---------------------------------|------------------------------------------------------------------|------|----------------------------------|
| WEP                    | 0.5           | $3.2 \times 10^{-10}$                                           | 0.92 | $1.6 \times 10^9$               | $9.2 \times 10^{-10}$                                            | 0.51 | $2.7 \times 10^9$                |
|                        | 1             | $8.4 \times 10^{-10}$                                           | 0.83 | $1.1 \times 10^9$               | $1.2 \times 10^{-9}$                                             | 0.52 | $1.9 \times 10^9$                |
|                        | 5             | $9.8 \times 10^{-10}$                                           | 0.83 | $6.1 \times 10^8$               | $1.4 \times 10^{-9}$                                             | 0.55 | $7.9 \times 10^8$                |
|                        | 10            | $5.3 \times 10^{-10}$                                           | 0.94 | $4.1 \times 10^8$               | $1.1 \times 10^{-9}$                                             | 0.52 | $5.1 \times 10^8$                |
|                        | 30            | $1.2 \times 10^{-9}$                                            | 0.87 | $1.3 \times 10^7$               |                                                                  |      |                                  |
|                        | 60            | $1.7 \times 10^{-9}$                                            | 0.84 | $6.0 \times 10^6$               |                                                                  |      |                                  |
| PCNS@C<br>MCS          | 0.5           | $7.5 \times 10^{-10}$                                           | 0.84 | $2.0 \times 10^9$               |                                                                  |      |                                  |
|                        | 1             | $6.5 \times 10^{-10}$                                           | 0.84 | $1.7 \times 10^9$               |                                                                  |      |                                  |
|                        | 5             | $9.1 \times 10^{-10}$                                           | 0.83 | $8.9 \times 10^8$               |                                                                  |      |                                  |
|                        | 10            | $3.9 \times 10^{-10}$                                           | 0.96 | $3.0 \times 10^8$               |                                                                  |      |                                  |
|                        | 30            | $9.2 \times 10^{-10}$                                           | 0.86 | $5.2 \times 10^7$               | $2.1 \times 10^{-8}$                                             | 0.37 | $6.9 \times 10^8$                |
|                        | 60            | $1.0 \times 10^{-9}$                                            | 0.85 | $1.2 \times 10^7$               | $2.2 \times 10^{-8}$                                             | 0.53 | $3.8 \times 10^7$                |
| PCNS@8-<br>HQ          | 0.5           | $8.1 \times 10^{-10}$                                           | 0.82 | $1.7 \times 10^9$               |                                                                  |      |                                  |
|                        | 1             | $9.4 \times 10^{-10}$                                           | 0.84 | $8.7 \times 10^8$               |                                                                  |      |                                  |
|                        | 5             | $9.8 \times 10^{-10}$                                           | 0.83 | $6.2 \times 10^8$               |                                                                  |      |                                  |
|                        | 10            | $3.2 \times 10^{-10}$                                           | 0.93 | $1.7 \times 10^9$               |                                                                  |      |                                  |
|                        | 30            | $9.1 \times 10^{-10}$                                           | 0.93 | $2.1 \times 10^9$               | 6.3                                                              | 0.96 | $2.2 \times 10^9$                |
|                        | 60            | $1.4 \times 10^{-9}$                                            | 0.77 | $1.4 \times 10^8$               | $2 \times 10^{-8}$                                               | 0.74 | $1.4 \times 10^8$                |
| PCNS@C<br>MCS@8-<br>HQ | 0.5           | $9.6 \times 10^{-10}$                                           | 0.76 | $4.3 \times 10^9$               |                                                                  |      |                                  |
|                        | 1             | $9.5 \times 10^{-10}$                                           | 0.78 | $3.9 \times 10^9$               |                                                                  |      |                                  |
|                        | 5             | $5.1 \times 10^{-10}$                                           | 0.89 | $1.7 \times 10^9$               |                                                                  |      |                                  |
|                        | 10            | $8.2 \times 10^{-10}$                                           | 0.86 | $6.9 \times 10^9$               |                                                                  |      |                                  |
|                        | 30            | $5.8 \times 10^{-10}$                                           | 0.85 | $2.4 \times 10^9$               |                                                                  |      |                                  |
|                        | 60            | $8.1 \times 10^{-10}$                                           | 0.86 | $1.7 \times 10^9$               |                                                                  |      |                                  |
